# Supplementary material for: iPSC-Derived Striatal Medium Spiny Neurons from Patients with Multiple System Atrophy Show Hypoexcitability and Elevated α-Synuclein Release
Source: MDPI journal article supplement (doi:10.3390/cells12020223), 2023-01-04
Supplement: s1 [file s1]

## Supplemental information

### Tables

**Supplementary Table S1. List of primary antibodies used in this study**

| Antibody                             | Species | Isotype   | Dilution | Cat.Nr.   | Source                                      |
|--------------------------------------|---------|-----------|----------|-----------|---------------------------------------------|
| <b><math>\alpha</math>-synuclein</b> | mouse   | IgG1      | 1:500    | sc-12767  | Santa Cruz Biotechnology, Dallas, TX, USA   |
| <b><math>\alpha</math>-synuclein</b> | rabbit  | IgG (H+L) | 1:1000   | 2642S     | Cell Signaling Technology, Danvers, MA, USA |
| <b><math>\beta</math>-actin</b>      | rabbit  | IgG (H+L) | 1:1000   | 5125S     | Cell Signaling Technology, Danvers, MA, USA |
| <b>CTIP2</b>                         | rat     | IgG2a     | 1:300    | ab18465   | Abcam, Cambridge, MA, USA                   |
| <b>GABA</b>                          | mouse   | IgG1      | 1:500    | A0310     | Sigma-Aldrich, St. Louis, MO, USA           |
| <b>GABA</b>                          | rabbit  | IgG (H+L) | 1:1000   | A2052     | Sigma-Aldrich, St. Louis, MO, USA           |
| <b>GAPDH</b>                         | mouse   | IgG1      | 1:1000   | sc-32233  | Santa Cruz Biotechnology, Dallas, TX, USA   |
| <b>GATA-4</b>                        | rabbit  | IgG (H+L) | 1:400    | MA5-32678 | Thermo Fisher Scientific, Waltham, MA, USA  |
| <b>Nestin</b>                        | mouse   | IgG1      | 1:300    | MAB1259   | R&D Systems, Minnesota, MN, USA             |
| <b>OCT4</b>                          | rabbit  | IgG (H+L) | 1:400    | 2750S     | Cell Signaling Technology, Danvers, MA, USA |
| <b>PAX6</b>                          | mouse   | IgG1      | 1:400    | ab78545   | Abcam, Cambridge, MA, USA                   |
| <b>SOX2</b>                          | rabbit  |           | 1:500    | 3579P     | Cell Signaling Technology, Danvers, MA, USA |
| <b>TRA-1-60</b>                      | mouse   | IgM       | 1:400    | ab16288   | Abcam, Cambridge, MA, USA                   |
| <b>TUJ1</b>                          | mouse   | IgG2a     | 1:1000   | ab78078   | Abcam, Cambridge, MA, USA                   |
| <b>TUJ1</b>                          | rabbit  | IgG (H+L) | 1:1000   | ab18207   | Abcam, Cambridge, MA, USA                   |
| <b>Vimentin</b>                      | mouse   | IgG1      | 1:400    | ab8978    | Abcam, Cambridge, MA, USA                   |
| <b>DAPI</b>                          |         |           |          |           | Thermo Fisher Scientific, Waltham, MA, USA  |

Abbreviations: COUP TF1-interacting protein 2 (CTIP2),  $\gamma$ -aminobutyric acid (GABA), GATA binding protein 4 (GATA-4), octamer-binding transcription factor 4 (OCT4), paired box protein Pax-6 (PAX6), SRY (sex determining region Y)-box 2 (SOX2), Podocalyxin (TRA-1-60),  $\beta$ -tubulin III (TUJ1), 4,6-diamidino-2-phenylindole (DAPI).

**Supplementary Table S2. List of secondary antibodies used in this study**

| Target species | Host species | Target antigen | AlexaFluor    | Dilution | Cat.Nr.   | Source                                     |
|----------------|--------------|----------------|---------------|----------|-----------|--------------------------------------------|
| mouse          | goat         | IgG1           | 555           | 1:1000   | A21127    | Thermo Fisher Scientific, Waltham, MA, USA |
| mouse          |              | IgG2a          | 488           |          | A21131    |                                            |
| mouse          |              | IgM            | 488           |          | A21042    |                                            |
| rabbit         |              | IgG            | 488           |          | A11034    |                                            |
| rabbit         |              | (H+L)          |               |          |           |                                            |
|                |              | IgG            | 555           |          | A21428    |                                            |
| rat            | (H+L)        |                |               |          |           |                                            |
|                | IgG          | 555            | A21434        |          |           |                                            |
| mouse          | horse        | IgG (H+L)      | na (Dot Blot) | 1:2500   | PI-2000-1 | Vector Laboratories, Burlingame, CA, USA   |
| rabbit         | goat         | IgG (H+L)      |               | 1:5000   | PI-1000-1 |                                            |

**Supplementary Table S3. List of oligosequences used for quantitative RT-PCR analysis**

| Target                                   | Primer sequence (5' → 3')                                       |
|------------------------------------------|-----------------------------------------------------------------|
| <i>iPSC characterization</i>             |                                                                 |
| c-Myc                                    | fwd: CCAGCAGCGACTCTGAGGA<br>rev: GAGCCTGCCTCTTTCCACAG           |
| Ki67                                     | fwd: AAGTACATGTGCCTGCTCGACCC<br>rev: TGTGACATGTGCTTGTCAACTGCG   |
| Nanog                                    | fwd: CACCTATGCCTGTGATTTGTGGGC<br>rev: AGAAGTGGGTTGTTTGCCTTTGGG  |
| Oct4                                     | fwd: GGAAGGAATTGGGAACACAAAGG<br>rev: AACTTCACCTTCCCTCCAACCA     |
| <i>MSN characterization</i>              |                                                                 |
| CTIP2                                    | fwd: CTCCGAGCTCAGGAAAGTGTC<br>rev: TCATCTTTACCTGCAATGTTCTCC     |
| FOXP1                                    | fwd: CCACGTGGAAGAATGCAGTGCG<br>rev: GCATTGAGAGGTGTGCAGTAGGC     |
| GAD67                                    | fwd: AGATCAACAAATGCCTGGAAGTGGC<br>rev: GAGCCACCTTGTGTAGCTTTTCCC |
| MAP2                                     | fwd: CAGGCAAAGGACAAAGTCTCTGACG<br>rev: CGCCGAGGAGGGAGAATGGAGG   |
| SST                                      | fwd: GAGATCTGCTAACTCAAACCCGGC<br>rev: TCGCTGAAGACTTGGAGGATTAGGG |
| α-Syn                                    | fwd: AAGAGGGTGTCTCTATGTAGGC<br>rev: GCTCCTCCAACATTTGTCACCT      |
| <i>GABA<sub>A</sub> receptor subunit</i> |                                                                 |

|                                                           |                                                                   |
|-----------------------------------------------------------|-------------------------------------------------------------------|
| $\alpha 1$                                                | fwd: TGCAGCTTGGAGACAGGATT<br>rev: TGAACCATCTTCCCCCTCTT            |
| $\alpha 2$                                                | fwd: AGAGGATGGACTTGGGATGG<br>rev: AAGATTTCGGGGCATAATTGG           |
| $\alpha 3$                                                | fwd: CACAAGTGTCTTCTGGCTCA<br>rev: TGGCACTGATACTCAAGGTGGT          |
| $\alpha 4$                                                | fwd: TCCGGTTTTTCATGCAAAGGT<br>rev: CTTTCATTAAGGATAAGCCAGTGGAA     |
| $\alpha 5$                                                | fwd: GGTGTCCTTTTGGCTGAACC<br>rev: GCCACTTTGGGCAGAGAGTT            |
| $\alpha 6$                                                | fwd: TTTCCCAGGTGTCTTTCTGGA<br>rev: GGCACTGATGCTCAAAGTGG           |
| $\beta 1$                                                 | fwd: ATGCATCTGCAGCCAGAGTC<br>rev: AGGGATCTTTGGCAGGGTCT            |
| $\beta 2$                                                 | fwd: CCCAAACCAAATGTCACTGC<br>rev: TGGAAGTGTCAACTTGCTTCAAA         |
| $\beta 3$                                                 | fwd: ATTGAAAGGCGCCATGTTTT<br>rev: GGGTTGGTCCTAGGGAGAGG            |
| $\gamma 1$                                                | fwd: GGAGATGGGGGATGATAGGC<br>rev: ATCCCTTCCACCCAACACAC            |
| $\gamma 2$                                                | fwd: TTGTCGAACAGGAGCTTGGA<br>rev: GAAGGCAGTGGGGAAGAAGA            |
| $\gamma 3$                                                | fwd: AACCAACCACCACGAAGAAGA<br>rev: CCTCATGTCCAGGAGGGAAT           |
| $\delta$                                                  | fwd: GTCTTTGCTCTGCAGGATCG<br>rev: CCAGGCCAAGGCTTTATTTC            |
| <i>GABA<sub>B</sub> receptor subunit</i>                  |                                                                   |
| <b>GABBR1</b>                                             | fwd: AGATGACTGAGGCGGTGGA<br>rev: TTCAGCCGCTTGGTAGTTTC             |
| <b>GABBR2</b>                                             | fwd: GAGCAGATCCGCAACGAGTCAC<br>rev: GACAGACGCCTCCAAACACCATC       |
| <i>ATP-regulated potassium (K<sub>ATP</sub>) channels</i> |                                                                   |
| <b>ABCC8</b>                                              | fwd: AACAAACGGCTGCTTTGTGGACG<br>rev: CAGGTTGTGCCCAGGGAATGAAG      |
| <b>ABCC9</b>                                              | fwd: TTGAAGCAACCAGAAGTAGGAACAGG<br>rev: GGCTGAAGAGAACAGGCATCTGTG  |
| <i>voltage-gated Ca<sup>2+</sup>-channel subunit</i>      |                                                                   |
| <b>Cav 1.2 (L-type)</b>                                   | fwd: CATTTGACGCCTTGATTGTTGTGGG<br>rev: GTATGTTACAGCTGGGTTTACCTCGG |
| <b>Cav 1.3 (L-type)</b>                                   | fwd: CGGACCCCGTCTCTGAAGGA<br>rev: CCTACGCGGATCGGGTTGGT            |
| <b>Cav 2.1 (P-type)</b>                                   | fwd: CCAGAACTTGCCCTACAGAAAGCC<br>rev: CGGGTCCATTTTCGTTATACAGGGC   |
| <b>Cav 2.2 (N-type)</b>                                   | fwd: TGCTGTTTCAGGAGCGCCACG<br>rev: CGGTGGCATTGGCCTGCTCA           |

|                         |                                                                |
|-------------------------|----------------------------------------------------------------|
| <b>Cav 2.3 (R-type)</b> | fwd: GTGGCCCTGGGGTTCATCTTCCATA<br>rev: CAGGATGCCACTGAGGACCACGA |
| <b>Cav 3.1 (T-type)</b> | fwd: TCAGCCTCCCCCTGAGCGTG<br>rev: TTCTGCAGGACCGCATGCCG         |
| <b>Cav 3.2 (T-type)</b> | fwd: GTCACCTCTGCTGCTGGATACGC<br>rev: TCAGGTTGTTGTTCTGACAAAGGC  |
| <b>Cav 3.3 (T-type)</b> | fwd: ATCGACTACACCCTGTGCTTCCG<br>rev: GACGTAGTCGAAGAGTTTGTGGGC  |
| <i>reference genes</i>  |                                                                |
| <b>B2M</b>              | fwd: TGCCTGCCGTGTGAACCATGT<br>rev: TGCGGAATCTTCAAACCTCCATGA    |
| <b>GAPDH</b>            | fwd: AGCCACATCGCTCAGACACCAT<br>rev: CAGGCGCCCAATACGACCAAAT     |
| <b>β-actin</b>          | fwd: CATGTACGTTGCTATCCAGGC<br>rev: CTCCTTAATGTCACGCACGAT       |

## Figures

### Supplementary Figure S1

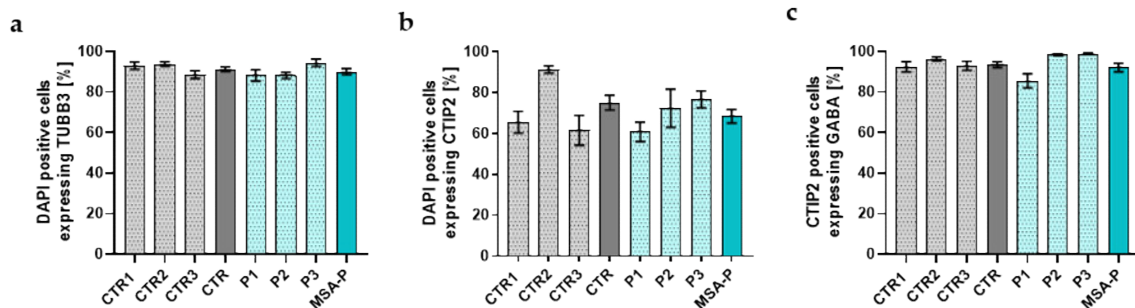

**Supplementary Figure S1:** Quantification of immunocytochemistry stainings of the mature MSNs at day 70 ( $\pm 3$  days) of differentiation, confirming the expression of (a) TUBB3 and (b) CTIP2 in 88-95% and 61-95% of all cells analyzed, respectively, as well as (c) GABA in 86-99% of the CTIP2-positive cells. Each cell line used in this study was analyzed separately and is shown separately.

### Supplementary Figure S2

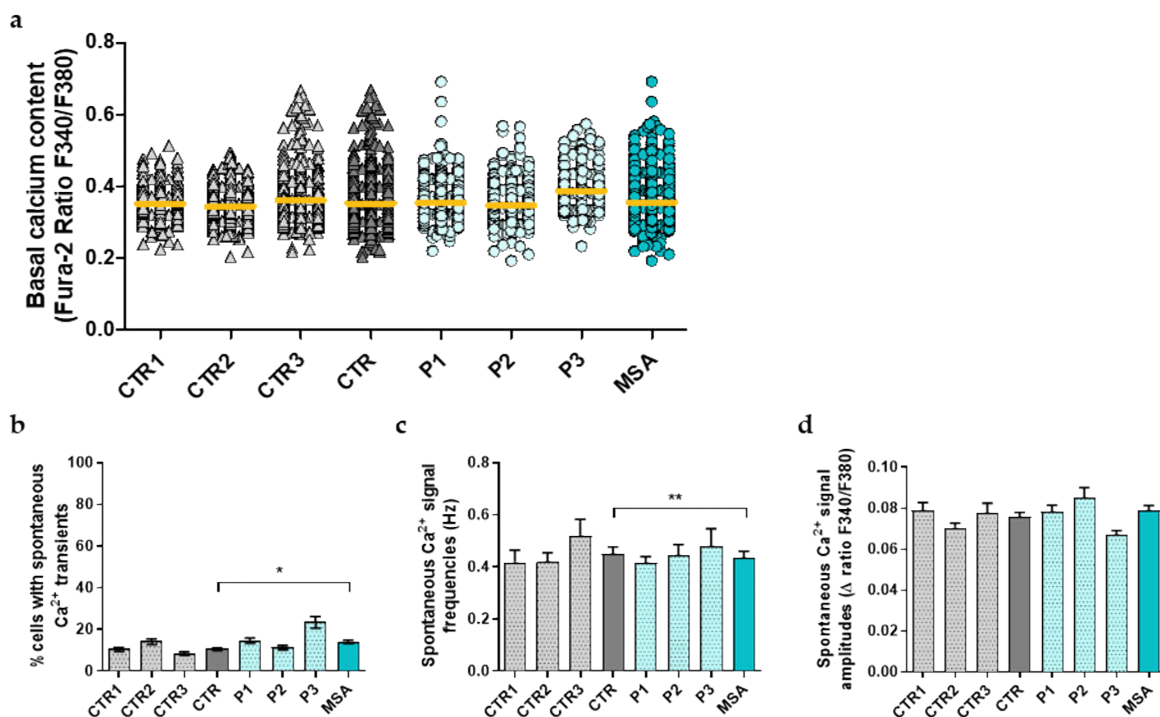

**Supplementary Figure S2:** Spontaneous calcium ( $\text{Ca}^{2+}$ ) signaling of the MSNs derived from the patients with MSA-P and the healthy controls. Intracellular  $\text{Ca}^{2+}$  transients are presented as ratios of the fluorescence signals obtained at 340 and 380 nm ( $\text{F}_{340}/\text{F}_{380}$ ). (a) Basal intracellular  $\text{Ca}^{2+}$  levels of all cell lines. (b) Percentage of cells exhibiting spontaneous  $\text{Ca}^{2+}$  transients, ( $p = 0.0251$ , nonparametric Mann-Whitney test) (c) frequency ( $p = 0.0047$ , nonparametric Mann-Whitney test) and (d) amplitudes of these transients. Each cell line was analyzed separately and is shown separately. Data are presented as means  $\pm$  SEM.

### Supplementary Figure S3

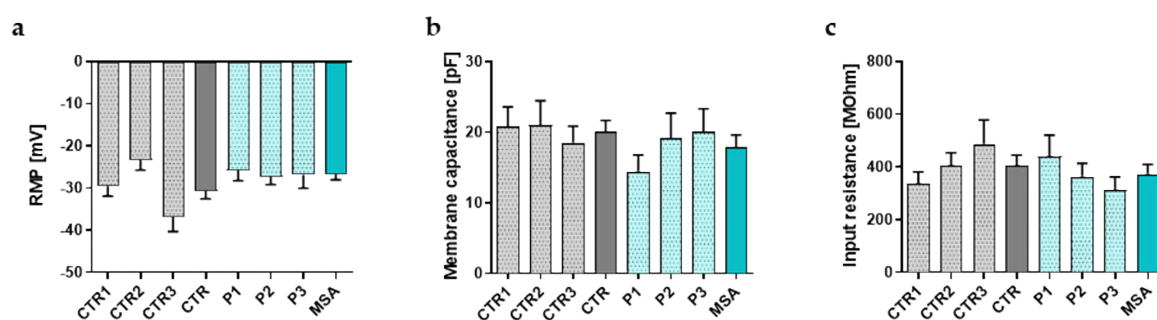

**Supplementary Figure S3:** Resting membrane potential (a), membrane capacitance (b), and input resistance (c) of each cell line measured by voltage-gated patch-clamp recordings. Data are presented as means  $\pm$  SEM.

### Supplementary Figure S4

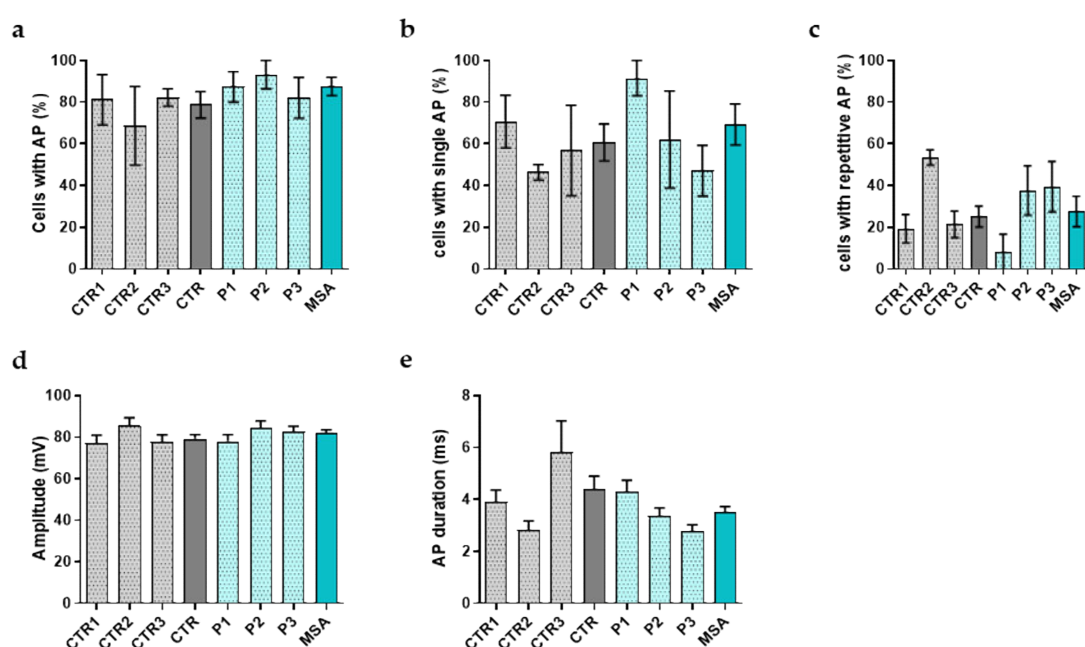

**Supplementary Figure S4:** (a) Percentage of cells able to spike action potentials (APs) evoked by depolarizing current pulses, (b) percentage of cells that produced a single evoked AP, and (c) percentage of cells with repetitive firing. (d) Amplitude and (e) duration of evoked APs measured by voltage-gated patch-clamp recordings for each cell line. Data are presented as means  $\pm$  SEM.

## Supplementary Figure S5

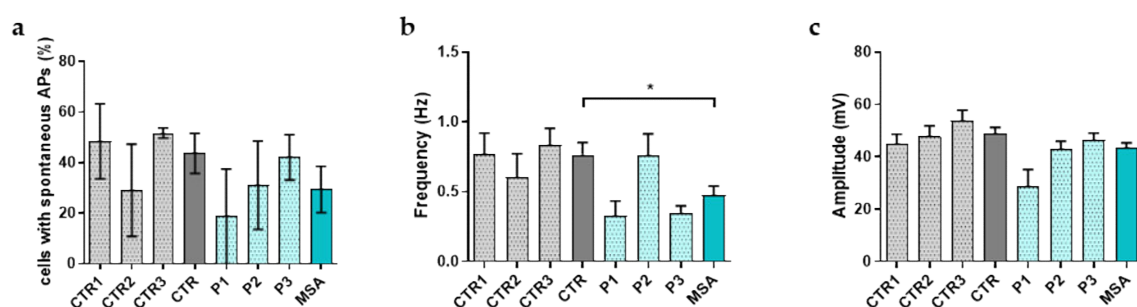

**Supplementary Figure S5:** Properties of spontaneous APs in the MSNs from the MSA-P patients and the healthy controls. (a) Percentage of neurons with spontaneous APs, (b) frequency ( $p = 0.0291$ , nonparametric Mann–Whitney test), and (c) amplitudes of spontaneous APs in all cell lines used in this study. Data are presented as means  $\pm$  SEM.

## Supplementary Figure S6

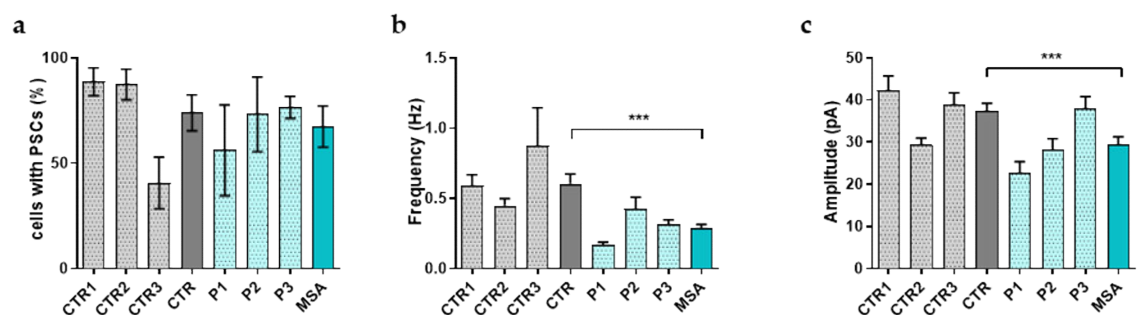

**Supplementary Figure S6:** Characteristics of miniature postsynaptic currents (mPSCs) in the MSNs from the MSA-P patients and the healthy controls. (a) Percentage of neurons showing mPSCs, (b) frequency ( $p = 0.0007$ , non-parametric Mann–Whitney test), and (c) amplitudes of mPSCs ( $p < 0.0001$ , nonparametric Mann–Whitney test) in all cell lines used in this study. Data are presented as means  $\pm$  SEM.
